# Supplementary material for: Characterising Maternal Sensitivity in a high risk, peri-urban LMIC context – The Drakenstein Child Health Study
Source: Research Square preprint supplement (doi:10.21203/rs.3.rs-7245707/v1), 2025-08-18
Supplement: Supplementary file 1 [file a136cf92bc9483cd4a5f5e92.docx]

Supplementary Material: Characterising Maternal Sensitivity in a high risk, peri-urban LMIC context – The Drakenstein Child Health Study

Results

**SF1** Emotional Availability Category Match

**ST1** Summed subscale correlations.

|  | Child Subscale Total | Child Responsivity Summed | Child Involvement  Summed |
| --- | --- | --- | --- |
| Maternal Subscale Total | .803** | .793** | .777** |
| Sensitivity Summed | .789** |  |  |
| Structuring Summed | .772** |  |  |
| Non-Intrusiveness Summed | .644** |  |  |
| Non-Hostility Summed | .666** |  |  |

*Note* * p < .05; ** p < .01; *** p < .001; ****p<.0001

**ST 2** Confirmatory Factor Analysis EAS Maternal Subscales

| **Fit Index** | **Value** | **Interpretation** |
| --- | --- | --- |
| Chi-Square Test (χ²) | 1168.097 (df = 344), p < 0.001 | Significant chi-square suggests poor fit; sensitive to sample size (N = 130) and model complexity. |
| Comparative Fit Index (CFI) | 0.717 | Below 0.90 threshold, indicating poor model fit. |
| Tucker-Lewis Index (TLI) | 0.689 | Below 0.90 threshold, indicating poor model fit. |
| Root Mean Square Error of Approximation (RMSEA) | 0.136, 90% CI: [0.127, 0.144], p = 0.000 (≤ 0.05) | RMSEA > 0.08 indicates poor fit; model does not adequately represent the data. |

**ST 3** Exploratory Factor Analysis EAS Maternal Subscales

| **Measure** | **Value / Stats** | **Interpretation** |
| --- | --- | --- |
| Root Mean Square of the Residuals (RMSR) | 0.06 (df-corrected) | Very good fit indicating low residuals. |
| Correlation of regression scores with factors | ML1, ML2, ML3: > 0.97 | Factor scores are very highly correlated with the actual factors, reflecting good representation by the items. |
| Multiple R-squared of scores with factors | ML1: 0.95, ML2: 0.94, ML3: 0.93 | High proportion of variance in factor scores explained by the factors. |
| Minimum correlation of possible factor scores | ML1: 0.91, ML2: 0.89, ML3: 0.87 | Even the least correlated factor score pairs are strongly related. |
| Mean Item Complexity | 1.3 | Even the least correlated factor score pairs are strongly related. |
| Cumulative Variance Explained | Factor 1: 25%, Factor 2: 22% (total 47%), Factor 3: 12% (total 59%) | The three factors explain 59% of total variance, indicating moderate explanatory power. |
